# Supplementary material for: Case-Fatality and Temporal Trends in Patients with Psoriasis and End-Stage Renal Disease
Source: MDPI journal article supplement (doi:10.3390/jcm11154328), 2022-07-26
Supplement: s1 [file s1]

**Table S1.** Baseline characteristics, treatment and outcome of patients with end-stage renal disease stratified by concomitant psoriasis (n = 1063) with and without psoriatic arthritis (cumulative data of the years 2005–2020).

| Parameters                                       | ESRD and Psoriasis with<br>Psoriatic Arthritis<br>(n = 98; 9.2%) | ESRD and Psoriasis without<br>Psoriatic Arthritis<br>(n = 965; 90.8%) | Absolute Risk<br>Difference (95%CI) |
|--------------------------------------------------|------------------------------------------------------------------|-----------------------------------------------------------------------|-------------------------------------|
| Age (years)                                      | 66 (56–75)                                                       | 66 (56–75)                                                            | -                                   |
| Sex (female)                                     | 48 (52.2%)                                                       | 313 (32.4%)                                                           | +16.0% (+6.4%; +26.7%)              |
| Obesity                                          | 19 (20.7%)                                                       | 168 (17.4%)                                                           | +1.9% (-5.1%; +11.2%)               |
| In-hospital stay                                 | 9 (3–20)                                                         | 8 (3–16)                                                              | -                                   |
| <b>Comorbidities</b>                             |                                                                  |                                                                       |                                     |
| Coronary artery disease                          | 38 (41.3%)                                                       | 295 (30.6%)                                                           | +8.2% (-1.3%; +18.5%)               |
| Malignancy                                       | 5 (5.4%)                                                         | 47 (4.9%)                                                             | +0.2% (-3.1%; +6.6%)                |
| Left heart failure                               | 26 (28.3%)                                                       | 263 (27.3%)                                                           | +0.7% (-8.9%; +9.1%)                |
| Right heart failure                              | 11 (11.9%)                                                       | 103 (10.7%)                                                           | +0.5% (-4.7%; +8.5%)                |
| COPD                                             | 14 (15.2%)                                                       | 161 (16.7%)                                                           | -2.4% (-8.5%; +6.2%)                |
| Diabetes mellitus                                | 42 (45.6%)                                                       | 417 (43.2%)                                                           | -0.4% (-10.2%; +10.0%)              |
| Arterial hypertension                            | 48 (52.1%)                                                       | 488 (50.6%)                                                           | -1.6% (-11.7%; +8.6%)               |
| Hypertensive Nephropathy                         | 11 (11.9%)                                                       | 92 (9.5%)                                                             | +1.7% (-3.6%; +9.6%)                |
| Atrial fibrillation/-flutter                     | 19 (20.7%)                                                       | 222 (23.0%)                                                           | -3.6% (-10.8%; +5.7%)               |
| Deep vein thrombosis or<br>thrombophlebitis      | n. c.                                                            | 7 (0.7%)                                                              | -                                   |
| <b>Dialysis modalities</b>                       |                                                                  |                                                                       |                                     |
| Dialysis general                                 | 44 (47.8%)                                                       | 430 (44.6%)                                                           | -0.3% (-9.6%; +10.7%)               |
| Haemofiltration                                  | n. c.                                                            | 24 (2.5%)                                                             | -                                   |
| Haemodialysis                                    | 42 (45.7%)                                                       | 424 (43.9%)                                                           | -1.8% (-10.8%; +5.7%)               |
| Haemodiafiltration                               | 10 (10.9%)                                                       | 101 (10.5%)                                                           | -0.1% (-5.3%; +7.5%)                |
| <b>Adverse events during<br/>hospitalization</b> |                                                                  |                                                                       |                                     |
| Gastro-intestinal bleeding                       | n. c.                                                            | 5 (0.0%)                                                              | -                                   |
| Intracranial bleeding                            | 0 (0.0%)                                                         | 0 (0.0%)                                                              | 0.0% (-0.0%; +3.8%)                 |
| Myocardial infarction                            | n. c.                                                            | 12 (1.2%)                                                             | -                                   |
| Ischemic Stroke                                  | 0 (0.0%)                                                         | 11 (1.1%)                                                             | -0.1% (-20.3%; +2.7%)               |
| Pulmonary embolism                               | n. c.                                                            | 5 (0.5%)                                                              | -                                   |
| Cardio-pulmonary reanimation                     | n. c.                                                            | 13 (1.3%)                                                             | -                                   |
| Transfusion of erythrocytes                      | 25 (27.2%)                                                       | 189 (19.6%)                                                           | -5.9% (-2.1%; +15.7%)               |
| MACCE                                            | 7 (7.6%)                                                         | 68 (7.0%)                                                             | -0.1% (-3.9%; +7.1%)                |
| In-hospital mortality                            | 6 (6.5%)                                                         | 53 (5.5%)                                                             | -0.6% (-3.1%; +7.4%)                |

n.c. = not calculable
